# Supplementary material for: Reaction kinetics and mechanism of CH4-SCR on Ru–In/H-SSZ-13
Source: Royal Society of Chemistry journal article supplement (doi:10.1039/d0cy01206h), 2020-01-01
Supplement: d0cy01206h1.pdf [file d0cy01206h1.pdf]

## Reaction kinetics and mechanism of CH<sub>4</sub>-SCR on Ru-In/H-SSZ-13

Jun Yang,<sup>a</sup> Yupeng Chang,<sup>a</sup> Guangjun Wu,<sup>\*a</sup> Weili Dai,<sup>a</sup> Naijia Guan<sup>a,b</sup> and Landong Li<sup>\*a,b</sup>

<sup>a</sup> School of Materials Science and Engineering & National Institute for Advanced Materials, Nankai University, Tianjin 300350, PR China

<sup>b</sup> Key Laboratory of Advanced Energy Materials Chemistry of the Ministry of Education, Nankai University, Tianjin 300071, PR China

\* Corresponding E-mail: [wuguangjun@nankai.edu.cn](mailto:wuguangjun@nankai.edu.cn); [lild@nankai.edu.cn](mailto:lild@nankai.edu.cn)

### Issues of mass transport effects

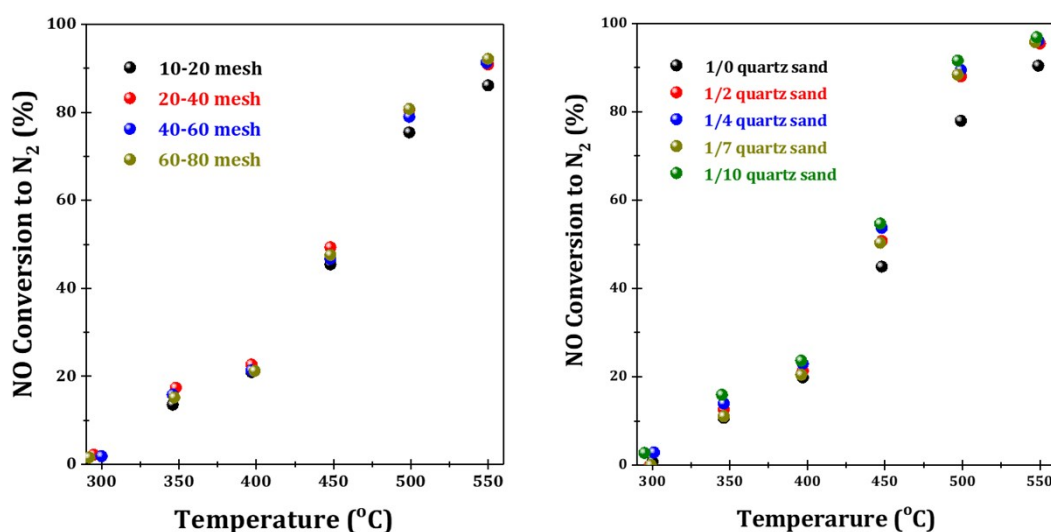

**Figure S1** CH<sub>4</sub>-SCR activity on Ru-In/H-SSZ-13 with different particle sizes (left-chart) and with different catalyst/quartz ratios while the particle sizes are kept at 20-40 mesh (right-chart). Reaction conditions: 2500 ppm NO, 4000 ppm CH<sub>4</sub>, 4% O<sub>2</sub>, He balance; GHSV=75,000 h<sup>-1</sup>

In order to ensure that the steady-state activity tests were taken in kinetics regions free of internal diffusion and external mass transfer resistances, two types of experiments were done [1-4]:

(i) The activities of Ru-In/H-SSZ-13 for NO conversion to N<sub>2</sub> were measured at different temperatures by changing the particle size while the ratio between catalyst and quartz sand is kept at 1:5. The intracrystallite mass transport limitations were also assessed by applying the following inequality [5]:

$$\frac{R_v \cdot (r_p)^2}{C_s \cdot D_e} < 1$$

Where  $R_v$  is the observed reaction rate per unit volume of catalyst,  $r_p$  is the crystallite radius,  $C_s$  is the product concentration at the crystallite surface, and  $D_e$  is the effective diffusivity of product. For CH<sub>4</sub>-SCR, the reaction rate per volume ( $R_v = \frac{n \cdot w\% \cdot sel\%}{t \cdot m}$ ) and the product concentration at the external crystallite surface ( $C_s = \frac{n \cdot w\% \cdot sel\%}{v}$ ) at 250 °C and 300 °C were calculated to be 0.149 mol m<sup>-3</sup> s<sup>-1</sup>, 0.0089 mol m<sup>-3</sup>, and 0.372 mol m<sup>-3</sup> s<sup>-1</sup>, 0.022 mol m<sup>-3</sup>, respectively, under the employed reaction conditions. The crystallite radius ( $r_p$ ) was estimated to <400 nm according to the SEM observation. The effective diffusivity of methane on CHA zeolite ( $D_e$ ) was calculated to be  $7 \cdot 10^{-12}$  m<sup>2</sup> s<sup>-1</sup> at 300 K [6]. The higher temperature, the lower  $D_e$  value. Therefore, according to all

these values, the  $\frac{R_v \cdot (r_p)^2}{C_s \cdot D_e}$  value in CH<sub>4</sub>-SCR was calculated to be <0.39, which satisfied the inequality and the intracrystallite mass transport limitations appeared to be neglectable in the kinetic studies.

(ii) The activities of Ru-In/H-SSZ-13 for NO conversion to N<sub>2</sub> were measured at different temperatures by changing the ratio between catalyst and quartz sand while the amounts of catalyst is fixed.

According to these results (**Figure S1**), catalyst samples with particle size of 20-40 mesh and catalyst to quartz sand (1:5) were used for kinetic studies.

## Steady-state reaction of CH<sub>4</sub>-SCR

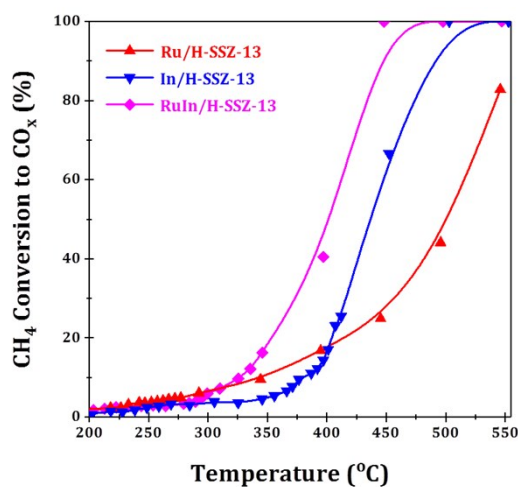

**Figure S2** Steady-state reaction of CH<sub>4</sub>-SCR over Ru/H-SSZ-13, In/H-SSZ-13 and RuIn/H-SSZ-13 catalysts. Reaction conditions: 2500 ppm NO, 1250 ppm CH<sub>4</sub>, 4% O<sub>2</sub>, He balance; GHSV=60,000 h<sup>-1</sup>

## Decomposition of NO at low temperatures

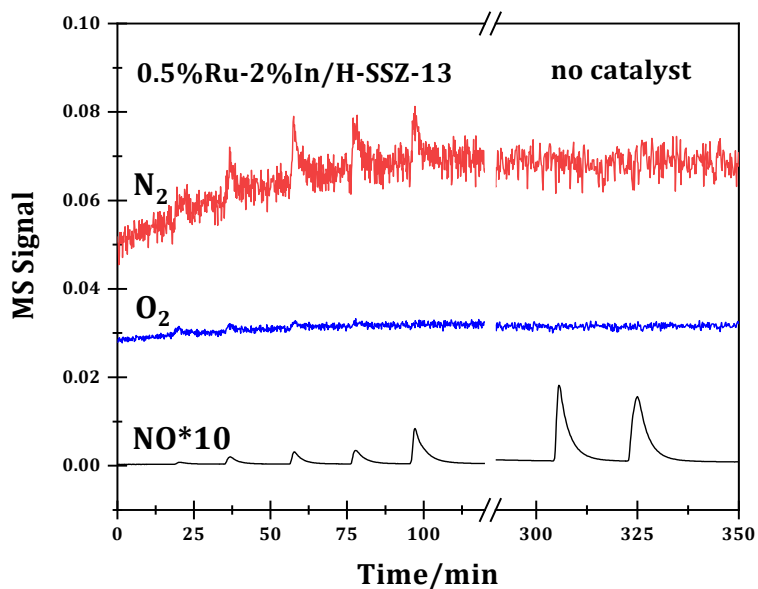

**Figure S3** Pulse-response experiments of NO feeding to 0.5%Ru-2%In/H-SSZ-13 at 250 °C. Reaction conditions: 0.12g catalyst; 5, 10, 15 and 25 ml/min × 10 s, and 33 ml/min × 20 s of NO; 50 ml/min of He balance; or 0g catalyst; 10 and 15 ml/min × 10 s of NO; 50 ml/min of He balance.

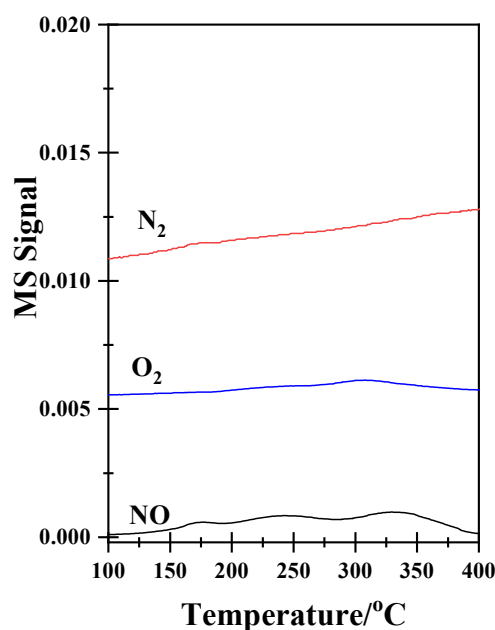

**Figure S4** NO-TPD profiles on 0.5%Ru-2%In/H-SSZ-13 catalyst.

## References

- [1] X. Wang, Y. Hong, H. Shi, J. Szanyi, Kinetic modeling and transient DRIFTS-MS studies of CO<sub>2</sub> methanation over Ru/Al<sub>2</sub>O<sub>3</sub> catalysts, *J. Catal.* 343 (2016) 185-195.
- [2] R.M. Koros, E.J. Nowak, A diagnostic test of the kinetic regime in a packed bed reactor, *Chem. Eng. Sci.* 22 (1967) 470.
- [3] G. Xu, J. Ma, G. He, Y. Yu, H. He, An alumina-supported silver catalyst with high water tolerance for H<sub>2</sub> assisted C<sub>3</sub>H<sub>6</sub>-SCR of NO<sub>x</sub>, *Appl. Catal. B: Environ.* 207 (2017) 60-71.
- [4] M. Iwasaki, E. Iglesia, Mechanistic assessments of NO oxidation turnover rates and active site densities on WO<sub>3</sub>-promoted CeO<sub>2</sub> catalysts, *J. Catal.* 342 (2016) 84-97.
- [5] D.E. Mears, Tests for transport limitations in experimental catalytic reactors, *Ind. Eng. Chem. Process Des. Develop.* 10 (1971) 541-547.
- [6] R. Krishna, J.v. Baten, Investigating the relative influences of molecular dimensions and binding energies on diffusivities of guest species inside nanoporous crystalline materials, *J. Phys. Chem. C* 116 (2012) 23556-23568.
